# Supplementary material for: Association between plasma eosinophil count and chronic kidney disease: results from the NHANES 2005-2018 and Mendelian randomization study
Source: Research Square preprint supplement (doi:10.21203/rs.3.rs-5712825/v1), 2025-01-02
Supplement: Supplementary file 1 [file 1a301bd1ec7e2b67ae0879ac.docx]

| **rsid** | **pval** | **chromosome** | **base_pair_location** | **effect_allele** | **other_allele** | **REF** | **effect_allele_frequency** | **beta** | **standard_error** | **p_value** | **n** | **INFO** | **N** | **r2** | **F** |
| --- | --- | --- | --- | --- | --- | --- | --- | --- | --- | --- | --- | --- | --- | --- | --- |
| rs1000263 | 3.4E-11 | 8 | 134109776 | C | G | C | 0.520654 | -0.0131059 | 0.00199285 | 3.4E-11 | 439938 | 0.997056 | 36291 | 0.000413683 | 15.01834722 |
| rs10042701 | 0.000000012 | 5 | 54476347 | A | C | A | 0.905113 | 0.0185419 | 0.00338557 | 0.000000012 | 439938 | 0.99681 | 36291 | 0.000278337 | 10.10338888 |
| rs1004870 | 6.1E-35 | 1 | 42370787 | C | T | C | 0.41099 | -0.0248797 | 0.00201558 | 6.1E-35 | 439938 | 0.99414 | 36291 | 0.001956709 | 71.14622213 |
| rs10062687 | 1.9E-23 | 5 | 10624866 | T | G | T | 0.767598 | -0.0232015 | 0.00235729 | 1.9E-23 | 439938 | 0.990826 | 36291 | 0.000680656 | 24.71714033 |
| rs10086276 | 1.9E-15 | 8 | 126604189 | G | A | G | 0.529424 | 0.0147007 | 0.00199904 | 1.9E-15 | 439938 | 0.994858 | 36291 | 0.00050812 | 18.44852395 |
| rs10165678 | 0.000000002 | 2 | 30446568 | G | A | G | 0.24135 | 0.0135682 | 0.00230696 | 0.000000002 | 439938 | 1 | 36291 | 0.000732304 | 26.5940623 |
| rs10174238 | 0.000000004 | 2 | 191973034 | G | A | G | 0.234711 | -0.0139012 | 0.00239906 | 0.000000004 | 439938 | 0.938095 | 36291 | 0.000732089 | 26.586228 |
| rs10414065 | 1.5E-20 | 19 | 33721455 | C | T | C | 0.933349 | 0.0373084 | 0.00406383 | 1.5E-20 | 439938 | 0.955573 | 36291 | 0.000946576 | 34.38283159 |
| rs10455025 | 3.3E-84 | 5 | 110404999 | A | C | A | 0.644598 | -0.0394741 | 0.00207287 | 3.3E-84 | 439938 | 0.997217 | 36291 | 0.002726797 | 99.22329213 |
| rs10466588 | 3.6E-14 | 11 | 116610249 | A | G | A | 0.924429 | 0.0280245 | 0.00376104 | 3.6E-14 | 439938 | 0.996553 | 36291 | 0.000574136 | 20.84679569 |
| rs10473333 | 0.000000029 | 5 | 43866596 | T | A | T | 0.941634 | -0.0232493 | 0.00427493 | 0.000000029 | 439938 | 0.97576 | 36291 | 0.000348753 | 12.66031097 |
| rs1047891 | 5.8E-18 | 2 | 211540507 | C | A | C | 0.684343 | -0.0172552 | 0.0021248 | 5.8E-18 | 439938 | 1 | 36291 | 0.000470983 | 17.09956217 |
| rs1057258 | 6.8E-33 | 2 | 234115629 | C | T | C | 0.821765 | 0.031142 | 0.00257918 | 6.8E-33 | 439938 | 1 | 36291 | 0.001057938 | 38.43217609 |
| rs1059091 | 4.2E-54 | 11 | 309127 | A | G | A | 0.679474 | -0.032438 | 0.00213216 | 4.2E-54 | 439938 | 1 | 36291 | 0.001679078 | 61.03454122 |
| rs10767658 | 1.8E-12 | 11 | 27672252 | C | G | C | 0.313331 | 0.0154884 | 0.00214296 | 1.8E-12 | 439938 | 0.999595 | 36291 | 0.000905812 | 32.90083023 |
| rs10777376 | 1.7E-25 | 12 | 92505068 | A | G | A | 0.463726 | 0.019907 | 0.00199602 | 1.7E-25 | 439938 | 0.995836 | 36291 | 0.001101939 | 40.03236157 |
| rs10799537 | 2.9E-14 | 1 | 229664544 | C | G | C | 0.785156 | 0.0180699 | 0.00241993 | 2.9E-14 | 439938 | 0.993815 | 36291 | 0.000393877 | 14.2990477 |
| rs10849818 | 7.2E-16 | 12 | 121364503 | A | T | A | 0.444885 | 0.0152054 | 0.00199791 | 7.2E-16 | 439938 | 0.997068 | 36291 | 0.000674491 | 24.49310853 |
| rs10893844 | 1.7E-31 | 11 | 128185850 | G | C | G | 0.497834 | -0.0222588 | 0.00199053 | 1.7E-31 | 439938 | 0.996323 | 36291 | 0.001265104 | 45.9675058 |
| rs10905281 | 4.6E-22 | 10 | 8109583 | C | A | C | 0.823789 | -0.0235582 | 0.002633 | 4.6E-22 | 439938 | 0.981491 | 36291 | 0.000596619 | 21.66364549 |
| rs10951792 | 5.5E-18 | 7 | 45086665 | A | G | A | 0.781155 | -0.0205949 | 0.00240255 | 5.5E-18 | 439938 | 0.99801 | 36291 | 0.000517456 | 18.78766667 |
| rs10982456 | 7.2E-33 | 9 | 117690758 | T | C | T | 0.567904 | 0.0232195 | 0.00200761 | 7.2E-33 | 439938 | 0.994812 | 36291 | 0.001150089 | 41.78362239 |
| rs1099448 | 2.2E-21 | 1 | 173231898 | C | T | C | 0.533129 | -0.0183185 | 0.00199933 | 2.2E-21 | 439938 | 0.982944 | 36291 | 0.000781674 | 28.38836173 |
| rs11024646 | 2E-14 | 11 | 2955929 | C | T | C | 0.781087 | -0.0182349 | 0.00241552 | 2E-14 | 439938 | 0.986764 | 36291 | 0.000404591 | 14.68816101 |
| rs11065991 | 1E-306 | 12 | 112083162 | C | T | C | 0.58466 | -0.0810693 | 0.00201629 | 1E-306 | 439938 | 0.99915 | 36291 | 0.013430103 | 493.9994779 |
| rs11071528 | 0.000000014 | 15 | 60701797 | G | C | G | 0.192718 | -0.0143055 | 0.00253287 | 0.000000014 | 439938 | 0.991406 | 36291 | 0.000758058 | 27.53003766 |
| rs11071559 | 2.5E-15 | 15 | 61069988 | C | T | C | 0.870002 | 0.0227633 | 0.00295979 | 2.5E-15 | 439938 | 1 | 36291 | 0.000482095 | 17.50317635 |
| rs111246112 | 1.1E-10 | 7 | 3055099 | A | T | A | 0.940725 | 0.0275075 | 0.0042313 | 1.1E-10 | 439938 | 0.988658 | 36291 | 0.000493032 | 17.90045117 |
| rs1114209 | 0.000000014 | 12 | 70603808 | G | C | G | 0.475959 | 0.0109839 | 0.00198683 | 0.000000014 | 439938 | 0.997986 | 36291 | 0.000326251 | 11.84317877 |
| rs111893345 | 5E-14 | 16 | 67607848 | C | T | C | 0.916467 | -0.0268066 | 0.00360167 | 5E-14 | 439938 | 0.996882 | 36291 | 0.00054826 | 19.90673821 |
| rs112026687 | 2.7E-13 | 7 | 50442372 | A | G | A | 0.914235 | 0.0267289 | 0.00355253 | 2.7E-13 | 439938 | 0.994461 | 36291 | 0.000552183 | 20.04924966 |
| rs11204682 | 1.6E-69 | 1 | 150595537 | G | T | G | 0.777489 | 0.0403845 | 0.00239223 | 1.6E-69 | 439938 | 0.986099 | 36291 | 0.002008077 | 73.01772865 |
| rs112066017 | 7.3E-31 | 1 | 65457988 | G | A | G | 0.928075 | -0.0433469 | 0.00387044 | 7.3E-31 | 439938 | 0.976424 | 36291 | 0.001337359 | 48.5964066 |
| rs11236813 | 8.2E-18 | 11 | 76343427 | G | C | G | 0.898777 | 0.0280849 | 0.00331027 | 8.2E-18 | 439938 | 0.989371 | 36291 | 0.000654317 | 23.76006431 |
| rs11253521 | 3.1E-47 | 10 | 976416 | G | C | G | 0.762248 | -0.0324975 | 0.00234251 | 3.1E-47 | 439938 | 0.990857 | 36291 | 0.001353675 | 49.19008174 |
| rs1131896 | 2.4E-46 | 6 | 31379115 | G | A | G | 0.768498 | -0.0371169 | 0.00291387 | 2.4E-46 | 439938 | 0.999517 | 36291 | 0.001532913 | 55.71329148 |
| rs113263629 | 3.3E-26 | 17 | 38063849 | A | T | A | 0.959934 | 0.0516951 | 0.00507432 | 3.3E-26 | 439938 | 0.999408 | 36291 | 0.001439924 | 52.32873803 |
| rs113317835 | 7.8E-28 | 7 | 3127690 | C | T | C | 0.802407 | -0.0251414 | 0.00250254 | 7.8E-28 | 439938 | 0.991863 | 36291 | 0.000725592 | 26.35012952 |
| rs113473633 | 3.1E-16 | 4 | 103449131 | A | G | A | 0.974035 | 0.0528273 | 0.00650981 | 3.1E-16 | 439938 | 0.920524 | 36291 | 0.001122273 | 40.77192701 |
| rs1138358 | 6.1E-30 | 15 | 80263345 | A | C | A | 0.736767 | 0.0252063 | 0.00226238 | 6.1E-30 | 439938 | 1 | 36291 | 0.000872054 | 31.67358011 |
| rs113859409 | 2.7E-10 | 14 | 94422198 | G | A | G | 0.960485 | 0.0318206 | 0.00539713 | 2.7E-10 | 439938 | 0.895878 | 36291 | 0.000511479 | 18.57055887 |
| rs114695117 | 2.9E-15 | 1 | 65209111 | C | A | C | 0.973546 | 0.0471203 | 0.00617045 | 2.9E-15 | 439938 | 1 | 36291 | 0.000953112 | 34.62046141 |
| rs114798795 | 3.9E-12 | 6 | 45559771 | G | A | G | 0.919202 | -0.0265304 | 0.0036608 | 3.9E-12 | 439938 | 0.989429 | 36291 | 0.000528709 | 19.19646985 |
| rs1151523 | 4.2E-48 | 11 | 65665200 | C | T | C | 0.457352 | -0.0286937 | 0.00200214 | 4.2E-48 | 439938 | 0.989392 | 36291 | 0.002321552 | 84.44284487 |
| rs115313152 | 2.4E-16 | 3 | 10319168 | C | T | C | 0.954873 | -0.0386469 | 0.00477397 | 2.4E-16 | 439938 | 1 | 36291 | 0.000858932 | 31.19659237 |
| rs115340020 | 5.5E-09 | 1 | 92766438 | G | A | G | 0.97171 | -0.0307513 | 0.00596622 | 5.5E-09 | 439938 | 1 | 36291 | 0.000422912 | 15.3535448 |
| rs11555542 | 1E-47 | 14 | 94417531 | T | C | T | 0.937324 | -0.0586284 | 0.00411105 | 1E-47 | 439938 | 1 | 36291 | 0.002303936 | 83.80058915 |
| rs115697464 | 4.1E-12 | 3 | 128175328 | T | C | T | 0.98486 | 0.0536269 | 0.00813901 | 4.1E-12 | 439938 | 0.99254 | 36291 | 0.000852357 | 30.9575608 |
| rs11588625 | 1.3E-16 | 1 | 221058846 | T | C | T | 0.862877 | 0.0228559 | 0.00287446 | 1.3E-16 | 439938 | 0.999272 | 36291 | 0.000500178 | 18.16005449 |
| rs11618532 | 1.7E-09 | 13 | 109809622 | A | C | A | 0.347266 | 0.0123496 | 0.00210261 | 1.7E-09 | 439938 | 0.98979 | 36291 | 0.000542682 | 19.70407433 |
| rs11624310 | 4.4E-13 | 14 | 69240079 | A | G | A | 0.436098 | -0.0144151 | 0.00200947 | 4.4E-13 | 439938 | 0.994339 | 36291 | 0.000617109 | 22.40810246 |
| rs11626205 | 3.5E-27 | 14 | 93024462 | G | A | G | 0.692985 | -0.0223729 | 0.00218217 | 3.5E-27 | 439938 | 0.975194 | 36291 | 0.000766486 | 27.83633575 |
| rs11628569 | 2.7E-15 | 14 | 103190362 | A | G | A | 0.709568 | 0.0173308 | 0.00220173 | 2.7E-15 | 439938 | 0.993124 | 36291 | 0.000442083 | 16.0498633 |
| rs11637216 | 1.6E-13 | 15 | 86205957 | T | G | T | 0.80841 | 0.0178894 | 0.0025561 | 1.6E-13 | 439938 | 0.980394 | 36291 | 0.000359327 | 13.04429969 |
| rs116497253 | 0.000000032 | 3 | 16886765 | G | A | G | 0.957649 | 0.0258237 | 0.00496378 | 0.000000032 | 439938 | 0.98275 | 36291 | 0.000368175 | 13.36560924 |
| rs116838287 | 0.000000025 | 1 | 65561252 | G | A | G | 0.959287 | 0.030337 | 0.0052881 | 0.000000025 | 439938 | 0.897439 | 36291 | 0.000475607 | 17.26750075 |
| rs11684770 | 9.2E-12 | 2 | 71281496 | A | G | A | 0.729305 | 0.0154649 | 0.00222428 | 9.2E-12 | 439938 | 0.99838 | 36291 | 0.000336171 | 12.20341717 |
| rs11693502 | 2.4E-16 | 2 | 136808949 | C | T | C | 0.271631 | 0.0179208 | 0.00229807 | 2.4E-16 | 439938 | 0.977427 | 36291 | 0.001209894 | 43.95901836 |
| rs11701383 | 4.7E-132 | 21 | 36411387 | G | C | G | 0.927034 | 0.094241 | 0.00391983 | 4.7E-132 | 439938 | 0.958849 | 36291 | 0.0062677 | 228.8831233 |
| rs1170439 | 4.9E-28 | 16 | 68608511 | T | C | T | 0.221226 | -0.0249849 | 0.00240924 | 4.9E-28 | 439938 | 0.987946 | 36291 | 0.002404737 | 87.47586857 |
| rs11747786 | 4.7E-13 | 5 | 72104415 | G | A | G | 0.473587 | -0.013774 | 0.00198578 | 4.7E-13 | 439938 | 0.997377 | 36291 | 0.000516405 | 18.74951702 |
| rs11786536 | 3.9E-27 | 8 | 129000416 | G | A | G | 0.835789 | 0.0282736 | 0.00270817 | 3.9E-27 | 439938 | 0.981672 | 36291 | 0.000828641 | 30.09548143 |
| rs11789898 | 1.7E-22 | 9 | 136925663 | G | T | G | 0.832942 | 0.0264465 | 0.00266911 | 1.7E-22 | 439938 | 0.995255 | 36291 | 0.000734424 | 26.67109286 |
| rs117961539 | 2.1E-11 | 8 | 144989466 | G | A | G | 0.960655 | 0.0337753 | 0.00518162 | 2.1E-11 | 439938 | 0.97619 | 36291 | 0.000601279 | 21.83292636 |
| rs12097268 | 7E-14 | 1 | 2477358 | T | A | T | 0.517562 | 0.0151348 | 0.00199589 | 7E-14 | 439938 | 0.981449 | 36291 | 0.000555385 | 20.16557148 |
| rs12155446 | 0.000000015 | 7 | 130622295 | C | T | C | 0.937158 | 0.0227979 | 0.0041005 | 0.000000015 | 439938 | 0.993216 | 36291 | 0.000349181 | 12.67586347 |
| rs1220139 | 9E-12 | 2 | 158511013 | C | T | C | 0.198627 | -0.0161613 | 0.00248472 | 9E-12 | 439938 | 0.992251 | 36291 | 0.000991197 | 36.00523571 |
| rs1228024 | 1.6E-11 | 11 | 47951353 | C | A | C | 0.339368 | -0.0133724 | 0.00211456 | 1.6E-11 | 439938 | 0.986466 | 36291 | 0.000644538 | 23.40470801 |
| rs12432697 | 1E-13 | 14 | 38053334 | G | T | G | 0.746333 | 0.0176901 | 0.0023342 | 1E-13 | 439938 | 0.960891 | 36291 | 0.00041463 | 15.05275412 |
| rs12435136 | 3.6E-10 | 14 | 77856184 | G | A | G | 0.543736 | -0.0126517 | 0.00200173 | 3.6E-10 | 439938 | 0.999466 | 36291 | 0.000362908 | 13.17433547 |
| rs12487980 | 5.8E-09 | 3 | 71760041 | C | A | C | 0.366345 | -0.0122951 | 0.00207766 | 5.8E-09 | 439938 | 0.982292 | 36291 | 0.000519724 | 18.87006882 |
| rs12515180 | 1.7E-282 | 5 | 131785684 | C | T | C | 0.57327 | 0.0706838 | 0.00200726 | 1.7E-282 | 439938 | 0.99807 | 36291 | 0.010521454 | 385.8729783 |
| rs1257192 | 0.000000041 | 2 | 134991024 | A | G | A | 0.188208 | -0.0138381 | 0.00253005 | 0.000000041 | 439938 | 0.993938 | 36291 | 0.000715256 | 25.97450745 |
| rs12572168 | 7.6E-15 | 10 | 111764786 | A | C | A | 0.863246 | 0.0212307 | 0.00289994 | 7.6E-15 | 439938 | 0.993881 | 36291 | 0.00042912 | 15.57902023 |
| rs12593759 | 2.1E-18 | 15 | 91202601 | A | G | A | 0.757694 | 0.0192805 | 0.00233827 | 2.1E-18 | 439938 | 0.987398 | 36291 | 0.0004812 | 17.47068988 |
| rs12602556 | 6.1E-39 | 17 | 65826861 | A | G | A | 0.804829 | -0.0322354 | 0.00251591 | 6.1E-39 | 439938 | 0.995048 | 36291 | 0.001184231 | 43.02552031 |
| rs12619285 | 5.3E-160 | 2 | 213824045 | A | G | A | 0.734717 | 0.0589029 | 0.00223864 | 5.3E-160 | 439938 | 1 | 36291 | 0.004807592 | 175.3055158 |
| rs1263602 | 1.9E-11 | 2 | 207928122 | T | G | T | 0.675701 | 0.014014 | 0.00211911 | 1.9E-11 | 439938 | 0.988912 | 36291 | 0.000316996 | 11.50712235 |
| rs12705849 | 1.8E-20 | 7 | 112782556 | G | A | G | 0.592393 | 0.0182164 | 0.00202344 | 1.8E-20 | 439938 | 1 | 36291 | 0.000664317 | 24.12344159 |
| rs1271582 | 1.5E-13 | 14 | 65564703 | T | G | T | 0.599014 | -0.0145758 | 0.00203406 | 1.5E-13 | 439938 | 0.99915 | 36291 | 0.000417421 | 15.1541126 |
| rs12767683 | 1.2E-11 | 10 | 104316581 | C | A | C | 0.676568 | -0.0140971 | 0.00212641 | 1.2E-11 | 439938 | 0.998124 | 36291 | 0.000319582 | 11.60101192 |
| rs12820863 | 5.4E-23 | 12 | 4318723 | C | T | C | 0.649481 | -0.0205785 | 0.00213425 | 5.4E-23 | 439938 | 0.948526 | 36291 | 0.00072126 | 26.19268969 |
| rs12861824 | 2.5E-16 | 13 | 31079184 | T | C | T | 0.727211 | 0.0193501 | 0.00239774 | 2.5E-16 | 439938 | 0.86491 | 36291 | 0.000507712 | 18.43370434 |
| rs12918121 | 0.000000018 | 16 | 67187795 | C | T | C | 0.981985 | 0.0398839 | 0.00754487 | 0.000000018 | 439938 | 1 | 36291 | 0.000524964 | 19.06041874 |
| rs12953708 | 8.1E-14 | 18 | 61352599 | A | G | A | 0.466214 | -0.0152188 | 0.00200219 | 8.1E-14 | 439938 | 0.995067 | 36291 | 0.000638335 | 23.17932986 |
| rs13138355 | 1.2E-82 | 4 | 83545976 | C | T | C | 0.814989 | 0.0478653 | 0.00256335 | 1.2E-82 | 439938 | 0.995451 | 36291 | 0.002538132 | 92.34063941 |
| rs13139941 | 1.6E-09 | 4 | 7071741 | A | G | A | 0.197038 | 0.0147317 | 0.00249809 | 1.6E-09 | 439938 | 0.996606 | 36291 | 0.00081804 | 29.71016021 |
| rs13195816 | 1.2E-12 | 6 | 109598624 | T | C | T | 0.475584 | -0.0139253 | 0.00198771 | 1.2E-12 | 439938 | 0.99978 | 36291 | 0.000524708 | 19.05112251 |
| rs13226583 | 1.2E-74 | 7 | 75454152 | A | T | A | 0.884533 | 0.0538887 | 0.00311396 | 1.2E-74 | 439938 | 0.993614 | 36291 | 0.002560155 | 93.14392131 |
| rs1323650 | 3.6E-09 | 10 | 6033049 | G | T | G | 0.318572 | 0.0130003 | 0.0021415 | 3.6E-09 | 439938 | 0.98646 | 36291 | 0.000630816 | 22.90612089 |
| rs13274067 | 5E-14 | 8 | 81267236 | G | A | G | 0.350315 | 0.0152447 | 0.00208927 | 5E-14 | 439938 | 0.996651 | 36291 | 0.000826659 | 30.02345877 |
| rs13416555 | 5.6E-36 | 2 | 8441735 | C | G | C | 0.707979 | 0.026001 | 0.00217451 | 5.6E-36 | 439938 | 0.997253 | 36291 | 0.00100478 | 36.49912497 |
| rs1353286 | 1.5E-22 | 3 | 27772014 | T | G | T | 0.546715 | -0.018616 | 0.00199611 | 1.5E-22 | 439938 | 0.991473 | 36291 | 0.000781415 | 28.37895521 |
| rs1377454 | 1.2E-11 | 2 | 148937370 | G | T | G | 0.559762 | 0.0135712 | 0.00199845 | 1.2E-11 | 439938 | 0.995526 | 36291 | 0.000401895 | 14.59023227 |
| rs140074 | 4.5E-30 | 22 | 31725634 | C | G | C | 0.514417 | -0.0218167 | 0.00199703 | 4.5E-30 | 439938 | 0.997421 | 36291 | 0.001162719 | 42.24302978 |
| rs140411271 | 3E-10 | 19 | 16228192 | G | A | G | 0.944394 | -0.0283783 | 0.0046793 | 3E-10 | 439938 | 0.855506 | 36291 | 0.000477514 | 17.33677265 |
| rs141214255 | 8.4E-16 | 6 | 32380128 | G | A | G | 0.985091 | 0.0697926 | 0.00835975 | 8.4E-16 | 439938 | 0.971532 | 36291 | 0.00138909 | 50.47882441 |
| rs1427499 | 5.5E-15 | 2 | 145400317 | A | G | A | 0.289594 | -0.0173678 | 0.00217823 | 5.5E-15 | 439938 | 1 | 36291 | 0.001178034 | 42.80010465 |
| rs1444782 | 2.5E-105 | 10 | 9058671 | G | A | G | 0.575711 | 0.042317 | 0.00200925 | 2.5E-105 | 439938 | 1 | 36291 | 0.003746662 | 136.4739423 |
| rs1448187 | 1.4E-14 | 2 | 112220359 | T | C | T | 0.30067 | -0.0179712 | 0.00236541 | 1.4E-14 | 439938 | 0.821452 | 36291 | 0.001100551 | 39.98191173 |
| rs146078144 | 6.8E-15 | 1 | 150889608 | G | A | G | 0.990414 | -0.0829872 | 0.0104409 | 6.8E-15 | 439938 | 0.947182 | 36291 | 0.001394926 | 50.69119522 |
| rs147081589 | 1.2E-10 | 6 | 45422199 | C | G | C | 0.988838 | 0.05934 | 0.0100619 | 1.2E-10 | 439938 | 0.876849 | 36291 | 0.000756935 | 27.48920831 |
| rs1474347 | 5.9E-33 | 7 | 22768124 | C | A | C | 0.425396 | 0.0231111 | 0.00201516 | 5.9E-33 | 439938 | 1 | 36291 | 0.001626763 | 59.12979993 |
| rs148219449 | 0.000000021 | 12 | 113339873 | G | A | G | 0.986437 | -0.0545884 | 0.00988701 | 0.000000021 | 439938 | 0.748255 | 36291 | 0.000659179 | 23.93673867 |
| rs149261628 | 5.7E-11 | 3 | 112707773 | A | G | A | 0.989412 | -0.0601704 | 0.00977715 | 5.7E-11 | 439938 | 0.975007 | 36291 | 0.00081394 | 29.56112265 |
| rs1493935 | 2.5E-09 | 8 | 119848956 | G | A | G | 0.332074 | -0.0124393 | 0.00211926 | 2.5E-09 | 439938 | 0.99514 | 36291 | 0.000566248 | 20.56022978 |
| rs150110 | 4.7E-09 | 6 | 167511766 | G | A | G | 0.337014 | -0.0123857 | 0.00211295 | 4.7E-09 | 439938 | 0.984702 | 36291 | 0.000556621 | 20.210452 |
| rs150853727 | 3.4E-11 | 6 | 29994190 | G | A | G | 0.959044 | 0.0410824 | 0.00622815 | 3.4E-11 | 439938 | 0.999578 | 36291 | 0.000725144 | 26.33384151 |
| rs1530161 | 1E-10 | 12 | 96804649 | A | G | A | 0.566628 | -0.0126825 | 0.00202989 | 1E-10 | 439938 | 0.974711 | 36291 | 0.000341787 | 12.40734395 |
| rs1586068 | 2.8E-32 | 2 | 213898232 | A | G | A | 0.0819481 | 0.0421936 | 0.00361924 | 2.8E-32 | 439938 | 0.989606 | 36291 | 0.003692897 | 134.5082653 |
| rs159963 | 2.9E-29 | 1 | 8504421 | C | A | C | 0.417758 | -0.0221354 | 0.00202064 | 2.9E-29 | 439938 | 0.98746 | 36291 | 0.001518376 | 55.18413221 |
| rs1651668 | 1.9E-17 | 16 | 57070165 | T | C | T | 0.529374 | -0.0166928 | 0.00200778 | 1.9E-17 | 439938 | 0.984191 | 36291 | 0.000653291 | 23.72275715 |
| rs16858573 | 2.3E-10 | 2 | 143875725 | T | C | T | 0.875156 | 0.0189833 | 0.00299964 | 2.3E-10 | 439938 | 0.992025 | 36291 | 0.000329873 | 11.97470037 |
| rs16903574 | 9.2E-18 | 5 | 14610309 | C | G | C | 0.923987 | -0.0325053 | 0.00382306 | 9.2E-18 | 439938 | 0.959393 | 36291 | 0.00076334 | 27.7219936 |
| rs16917546 | 7.3E-97 | 10 | 64397538 | T | C | T | 0.631047 | 0.042452 | 0.00205618 | 7.3E-97 | 439938 | 0.999168 | 36291 | 0.003266852 | 118.9393344 |
| rs16928078 | 8E-11 | 11 | 2320013 | C | T | C | 0.887444 | 0.0212575 | 0.00315532 | 8E-11 | 439938 | 0.99357 | 36291 | 0.000393326 | 14.27903026 |
| rs16958590 | 4.4E-11 | 18 | 45413553 | A | C | A | 0.986454 | -0.0537207 | 0.00861972 | 4.4E-11 | 439938 | 0.997141 | 36291 | 0.00078646 | 28.56231765 |
| rs17061503 | 4.3E-54 | 13 | 41246758 | G | A | G | 0.692753 | -0.0330272 | 0.00216504 | 4.3E-54 | 439938 | 0.991642 | 36291 | 0.001678103 | 60.99906014 |
| rs17175830 | 1.2E-37 | 16 | 88558164 | G | A | G | 0.762784 | -0.0299514 | 0.00236369 | 1.2E-37 | 439938 | 0.977176 | 36291 | 0.00114337 | 41.53925537 |
| rs17482472 | 1.4E-18 | 10 | 44859618 | G | A | G | 0.90097 | 0.0290168 | 0.0033457 | 1.4E-18 | 439938 | 0.986918 | 36291 | 0.000691289 | 25.1035408 |
| rs1751242 | 1E-56 | 9 | 113641783 | T | A | T | 0.61715 | -0.031977 | 0.00204226 | 1E-56 | 439938 | 0.998725 | 36291 | 0.001921188 | 69.85219771 |
| rs175705 | 1.9E-64 | 14 | 75975648 | C | G | C | 0.280613 | -0.0371565 | 0.00222088 | 1.9E-64 | 439938 | 0.998374 | 36291 | 0.00535654 | 195.4302991 |
| rs17682575 | 4.1E-12 | 2 | 43152304 | C | T | C | 0.79848 | 0.0169507 | 0.00248934 | 4.1E-12 | 439938 | 0.976027 | 36291 | 0.000333148 | 12.09362754 |
| rs17758695 | 4.3E-82 | 18 | 60920854 | C | T | C | 0.970634 | 0.111957 | 0.00590577 | 4.3E-82 | 439938 | 1 | 36291 | 0.005677075 | 207.191622 |
| rs17878498 | 2.3E-48 | 3 | 3152930 | G | T | G | 0.752807 | -0.0327448 | 0.00231731 | 2.3E-48 | 439938 | 0.979964 | 36291 | 0.001407857 | 51.16176821 |
| rs1800692 | 1.9E-21 | 12 | 6442346 | A | G | A | 0.412642 | 0.018922 | 0.00203555 | 1.9E-21 | 439938 | 0.979129 | 36291 | 0.001116635 | 40.56685703 |
| rs1805721 | 1.4E-14 | 12 | 9147569 | G | A | G | 0.543157 | 0.0154235 | 0.00199359 | 1.4E-14 | 439938 | 1 | 36291 | 0.000541564 | 19.66345834 |
| rs182050989 | 2.6E-09 | 1 | 27262545 | C | T | C | 0.971763 | -0.0341807 | 0.00599446 | 2.6E-09 | 439938 | 0.990689 | 36291 | 0.000519626 | 18.86650312 |
| rs1828803 | 4.1E-12 | 4 | 2689449 | C | A | C | 0.607199 | -0.0140877 | 0.00203823 | 4.1E-12 | 439938 | 0.99689 | 36291 | 0.000382059 | 13.86983536 |
| rs1848870 | 1.2E-09 | 18 | 48498871 | A | G | A | 0.619018 | -0.0121937 | 0.0020524 | 1.2E-09 | 439938 | 0.998449 | 36291 | 0.000277372 | 10.06835071 |
| rs1861160 | 7.4E-11 | 14 | 73365712 | G | A | G | 0.683123 | -0.0134959 | 0.002143 | 7.4E-11 | 439938 | 0.99677 | 36291 | 0.000287594 | 10.43949095 |
| rs1897135 | 1.4E-15 | 4 | 39078957 | T | C | T | 0.263004 | 0.0183867 | 0.00226189 | 1.4E-15 | 439938 | 0.995993 | 36291 | 0.001326594 | 48.20471307 |
| rs1942 | 9.6E-10 | 15 | 41774423 | A | G | A | 0.473552 | -0.0116644 | 0.00199591 | 9.6E-10 | 439938 | 1 | 36291 | 0.000368899 | 13.39191795 |
| rs199534 | 8.9E-33 | 17 | 44824213 | T | G | T | 0.785774 | 0.0269639 | 0.00242595 | 8.9E-33 | 439938 | 0.998878 | 36291 | 0.000874889 | 31.77665169 |
| rs2001884 | 1.5E-12 | 17 | 17602977 | T | A | T | 0.494667 | 0.013045 | 0.00198717 | 1.5E-12 | 439938 | 0.998446 | 36291 | 0.000438584 | 15.92277084 |
| rs201798 | 4E-24 | 13 | 50954721 | G | A | G | 0.38487 | -0.0204922 | 0.00205413 | 4E-24 | 439938 | 0.995134 | 36291 | 0.001393946 | 50.65550246 |
| rs2025486 | 8.8E-13 | 6 | 87796886 | T | C | T | 0.427698 | -0.0141396 | 0.0020202 | 8.8E-13 | 439938 | 0.981763 | 36291 | 0.000603946 | 21.92984053 |
| rs2036982 | 1E-17 | 4 | 123584946 | T | C | T | 0.695279 | -0.017945 | 0.00216714 | 1E-17 | 439938 | 0.997026 | 36291 | 0.0004925 | 17.88115105 |
| rs2038700 | 3E-19 | 14 | 25461989 | T | C | T | 0.606029 | -0.0170428 | 0.00204225 | 3E-19 | 439938 | 0.995274 | 36291 | 0.000560043 | 20.33480204 |
| rs2043293 | 8.5E-10 | 19 | 19751456 | C | A | C | 0.173947 | 0.0153873 | 0.00262266 | 8.5E-10 | 439938 | 1 | 36291 | 0.000845967 | 30.72530208 |
| rs2058811 | 0.000000015 | 16 | 4575162 | C | T | C | 0.309749 | 0.0122481 | 0.00215513 | 0.000000015 | 439938 | 0.997255 | 36291 | 0.000567166 | 20.59355721 |
| rs2072130 | 5.7E-53 | 16 | 27356398 | C | T | C | 0.635534 | -0.0302731 | 0.00207125 | 5.7E-53 | 439938 | 0.992793 | 36291 | 0.001637722 | 59.52879443 |
| rs2075995 | 1.7E-23 | 1 | 23847464 | C | A | C | 0.498588 | 0.0193347 | 0.00197968 | 1.7E-23 | 439938 | 1 | 36291 | 0.000956531 | 34.74477862 |
| rs2085422 | 1.6E-29 | 7 | 50326026 | A | G | A | 0.269548 | -0.0248439 | 0.00226254 | 1.6E-29 | 439938 | 0.976861 | 36291 | 0.002388316 | 86.87707375 |
| rs2111485 | 1.6E-17 | 2 | 163110536 | A | G | A | 0.392571 | 0.0168919 | 0.00202303 | 1.6E-17 | 439938 | 1 | 36291 | 0.000942829 | 34.24661731 |
| rs214084 | 1.8E-09 | 11 | 17298814 | A | G | A | 0.421368 | -0.0119085 | 0.00201085 | 1.8E-09 | 439938 | 1 | 36291 | 0.000437295 | 15.87595185 |
| rs2169027 | 1.9E-09 | 2 | 72083272 | A | G | A | 0.0827194 | 0.0201865 | 0.0035982 | 1.9E-09 | 439938 | 0.992027 | 36291 | 0.000854818 | 31.04702428 |
| rs2173714 | 3E-10 | 16 | 69878534 | C | G | C | 0.62315 | -0.0131503 | 0.00205789 | 3E-10 | 439938 | 0.996467 | 36291 | 0.000319057 | 11.58194628 |
| rs2203644 | 1.4E-20 | 4 | 153275701 | T | C | T | 0.296584 | 0.0206337 | 0.00218253 | 1.4E-20 | 439938 | 0.999239 | 36291 | 0.001632275 | 59.33048149 |
| rs2211595 | 3.6E-16 | 10 | 90843886 | C | T | C | 0.780337 | -0.0187812 | 0.00240353 | 3.6E-16 | 439938 | 0.998393 | 36291 | 0.00043091 | 15.64404761 |
| rs2223043 | 1.4E-15 | 21 | 16438793 | A | G | A | 0.694336 | -0.0175324 | 0.00229806 | 1.4E-15 | 439938 | 0.884449 | 36291 | 0.000456225 | 16.56349166 |
| rs2228467 | 1.6E-41 | 3 | 42906116 | T | C | T | 0.938638 | -0.0548895 | 0.00412141 | 1.6E-41 | 439938 | 1 | 36291 | 0.00201195 | 73.158855 |
| rs2228570 | 5.1E-09 | 12 | 48272895 | A | G | A | 0.385851 | -0.0118608 | 0.00203922 | 5.1E-09 | 439938 | 1 | 36291 | 0.000469251 | 17.03662852 |
| rs2239633 | 3.5E-57 | 14 | 23589057 | G | A | G | 0.516608 | -0.0308518 | 0.00199204 | 3.5E-57 | 439938 | 1 | 36291 | 0.002316491 | 84.25831444 |
| rs2242886 | 2.5E-139 | 21 | 36387806 | C | T | C | 0.928979 | 0.0962116 | 0.00389045 | 2.5E-139 | 439938 | 1 | 36291 | 0.006554379 | 239.421132 |
| rs2243603 | 0.000000027 | 20 | 1546911 | C | G | C | 0.233782 | 0.0117739 | 0.00236124 | 0.000000027 | 439938 | 1 | 36291 | 0.000539411 | 19.58524435 |
| rs2265888 | 9.6E-10 | 10 | 43922020 | A | C | A | 0.197935 | 0.0147833 | 0.00250902 | 9.6E-10 | 439938 | 0.987966 | 36291 | 0.000816577 | 29.65697897 |
| rs228951 | 1.8E-25 | 22 | 37529798 | A | G | A | 0.636802 | 0.021264 | 0.00210136 | 1.8E-25 | 439938 | 0.971806 | 36291 | 0.000799194 | 29.02513094 |
| rs2296618 | 8.4E-47 | 1 | 198666232 | A | G | A | 0.863025 | 0.0397685 | 0.00290677 | 8.4E-47 | 439938 | 0.979068 | 36291 | 0.001504151 | 54.6663569 |
| rs2306700 | 3.2E-13 | 3 | 142123841 | C | T | C | 0.864862 | 0.0203075 | 0.00290462 | 3.2E-13 | 439938 | 0.993726 | 36291 | 0.000391204 | 14.20196749 |
| rs231793 | 0.00000002 | 2 | 204702343 | C | T | C | 0.0539559 | 0.0251499 | 0.00438781 | 0.00000002 | 439938 | 0.988493 | 36291 | 0.000901513 | 32.74453925 |
| rs2338016 | 2.3E-33 | 2 | 28684932 | T | A | T | 0.485064 | 0.0233025 | 0.00198166 | 2.3E-33 | 439938 | 0.996963 | 36291 | 0.001437282 | 52.23259502 |
| rs2381416 | 1.1E-306 | 9 | 6193455 | C | A | C | 0.263776 | 0.0932237 | 0.00225332 | 1.1E-306 | 439938 | 1 | 36291 | 0.034236277 | 1286.443291 |
| rs2395849 | 3.2E-09 | 8 | 129677621 | C | G | C | 0.419561 | -0.011621 | 0.00202365 | 3.2E-09 | 439938 | 0.990677 | 36291 | 0.000415981 | 15.10180357 |
| rs2399441 | 4.6E-19 | 3 | 112587012 | T | C | T | 0.650446 | 0.01825 | 0.00207658 | 4.6E-19 | 439938 | 0.999399 | 36291 | 0.000574668 | 20.8661284 |
| rs2424876 | 1.8E-10 | 20 | 30952181 | T | G | T | 0.173844 | 0.0172196 | 0.00263512 | 1.8E-10 | 439938 | 0.995814 | 36291 | 0.001050646 | 38.16699014 |
| rs2431696 | 3.1E-15 | 5 | 159879258 | A | G | A | 0.799616 | 0.0182356 | 0.0024762 | 3.1E-15 | 439938 | 0.997907 | 36291 | 0.000385816 | 14.006273 |
| rs2514591 | 1.3E-09 | 8 | 119611476 | A | G | A | 0.11417 | 0.0186044 | 0.00317534 | 1.3E-09 | 439938 | 0.970277 | 36291 | 0.000913378 | 33.17586884 |
| rs2519093 | 4.4E-24 | 9 | 136141870 | C | T | C | 0.815633 | 0.0259886 | 0.00256787 | 4.4E-24 | 439938 | 0.999312 | 36291 | 0.000746671 | 27.11618115 |
| rs2537860 | 2.8E-09 | 4 | 55484718 | A | C | A | 0.435894 | 0.012159 | 0.00203156 | 2.8E-09 | 439938 | 0.971392 | 36291 | 0.000435102 | 15.79630054 |
| rs2579500 | 3.2E-119 | 2 | 97201682 | G | A | G | 0.611159 | -0.0453915 | 0.00203096 | 3.2E-119 | 439938 | 0.99789 | 36291 | 0.003937988 | 143.4706269 |
| rs2584661 | 9.1E-32 | 17 | 47470534 | G | A | G | 0.652042 | 0.0236118 | 0.00209254 | 9.1E-32 | 439938 | 0.994763 | 36291 | 0.000954543 | 34.6725076 |
| rs2646392 | 2.7E-24 | 10 | 8565101 | C | A | C | 0.43428 | 0.0197008 | 0.00200406 | 2.7E-24 | 439938 | 0.99957 | 36291 | 0.001160813 | 42.17371135 |
| rs2695479 | 4E-18 | 12 | 123689386 | T | C | T | 0.201212 | -0.0220124 | 0.00247968 | 4E-18 | 439938 | 0.999636 | 36291 | 0.001837957 | 66.82042551 |
| rs274688 | 7.7E-09 | 5 | 6758090 | A | G | A | 0.324248 | -0.0113794 | 0.00213175 | 7.7E-09 | 439938 | 0.982933 | 36291 | 0.000479496 | 17.40876997 |
| rs2773818 | 4.6E-13 | 9 | 135859519 | C | A | C | 0.552934 | -0.014026 | 0.00199632 | 4.6E-13 | 439938 | 1 | 36291 | 0.000436819 | 15.85866179 |
| rs2807743 | 5.3E-50 | 10 | 28780293 | C | T | C | 0.230575 | -0.0339613 | 0.0023724 | 5.3E-50 | 439938 | 0.983722 | 36291 | 0.004480484 | 163.3240695 |
| rs28408622 | 7.4E-17 | 21 | 34441675 | A | C | A | 0.570367 | -0.016979 | 0.00203045 | 7.4E-17 | 439938 | 0.982675 | 36291 | 0.000607 | 22.04080495 |
| rs2847266 | 3.1E-10 | 18 | 12773338 | C | T | C | 0.282422 | 0.013638 | 0.00224362 | 3.1E-10 | 439938 | 0.967573 | 36291 | 0.000708701 | 25.73629758 |
| rs28768973 | 3.6E-10 | 12 | 46979191 | C | T | C | 0.918078 | -0.0221595 | 0.00363 | 3.6E-10 | 439938 | 0.990651 | 36291 | 0.000371701 | 13.49368326 |
| rs30130 | 2.2E-11 | 5 | 156636815 | C | T | C | 0.276136 | -0.0148382 | 0.00222234 | 2.2E-11 | 439938 | 0.994607 | 36291 | 0.000861782 | 31.30016513 |
| rs3024971 | 7.7E-40 | 12 | 57493727 | T | G | T | 0.893177 | 0.0419142 | 0.00321652 | 7.7E-40 | 439938 | 0.995042 | 36291 | 0.001497402 | 54.42072356 |
| rs305089 | 2.1E-20 | 16 | 85981030 | T | C | T | 0.338956 | -0.0203548 | 0.00212757 | 2.1E-20 | 439938 | 0.973715 | 36291 | 0.001484136 | 53.93786618 |
| rs3093562 | 3.5E-19 | 6 | 31551537 | C | G | C | 0.878023 | 0.0297401 | 0.00361832 | 3.5E-19 | 439938 | 0.998252 | 36291 | 0.000709819 | 25.7769226 |
| rs3101725 | 3.5E-09 | 5 | 127524018 | T | C | T | 0.24023 | -0.0134038 | 0.00232434 | 3.5E-09 | 439938 | 0.995246 | 36291 | 0.000707958 | 25.70929984 |
| rs310747 | 1.2E-41 | 3 | 12259545 | T | G | T | 0.37479 | 0.0268612 | 0.00205999 | 1.2E-41 | 439938 | 0.986339 | 36291 | 0.002450242 | 89.13523349 |
| rs3110791 | 3.9E-11 | 7 | 135367828 | T | C | T | 0.375934 | -0.0137576 | 0.00206647 | 3.9E-11 | 439938 | 0.98379 | 36291 | 0.000638784 | 23.19565053 |
| rs311500 | 0.000000023 | 20 | 62216808 | C | T | C | 0.0992336 | -0.0193218 | 0.00335148 | 0.000000023 | 439938 | 0.985538 | 36291 | 0.000894245 | 32.48029114 |
| rs3122605 | 1.6E-11 | 1 | 206955041 | G | A | G | 0.143166 | -0.0181798 | 0.00286124 | 1.6E-11 | 439938 | 0.972109 | 36291 | 0.001040634 | 37.80290036 |
| rs336030 | 0.000000011 | 2 | 38266996 | G | T | G | 0.467977 | 0.0110919 | 0.00197923 | 0.000000011 | 439938 | 1 | 36291 | 0.000340646 | 12.36592789 |
| rs34108746 | 2.5E-50 | 11 | 57146225 | A | G | A | 0.921573 | 0.0538921 | 0.00369403 | 2.5E-50 | 439938 | 1 | 36291 | 0.002160147 | 78.55929011 |
| rs34173062 | 6.1E-39 | 8 | 145158607 | G | A | G | 0.927812 | -0.0514574 | 0.00407493 | 6.1E-39 | 439938 | 0.886358 | 36291 | 0.001809331 | 65.77782946 |
| rs34210653 | 6.5E-145 | 17 | 4535314 | G | A | G | 0.978917 | 0.17413 | 0.0069252 | 6.5E-145 | 439938 | 1 | 36291 | 0.011235352 | 412.3526315 |
| rs34212866 | 7.6E-15 | 15 | 43702964 | A | G | A | 0.778579 | -0.0175007 | 0.00240795 | 7.6E-15 | 439938 | 0.991062 | 36291 | 0.000375057 | 13.6155384 |
| rs34290285 | 3.5E-98 | 2 | 242698640 | G | A | G | 0.743371 | 0.0463433 | 0.00226312 | 3.5E-98 | 439938 | 0.995682 | 36291 | 0.002908303 | 105.8472272 |
| rs34448954 | 1.2E-12 | 1 | 161168189 | C | T | C | 0.893866 | 0.0241437 | 0.00321593 | 1.2E-12 | 439938 | 0.998165 | 36291 | 0.000496386 | 18.02228378 |
| rs34466956 | 3.5E-12 | 19 | 3353622 | C | T | C | 0.432105 | 0.0139217 | 0.00202244 | 3.5E-12 | 439938 | 0.981871 | 36291 | 0.000578282 | 20.99740976 |
| rs34619169 | 5.5E-20 | 9 | 139327277 | G | A | G | 0.692493 | -0.0188413 | 0.00215579 | 5.5E-20 | 439938 | 0.993145 | 36291 | 0.000547657 | 19.88480274 |
| rs34780507 | 9.7E-39 | 22 | 41405753 | A | G | A | 0.933688 | 0.050989 | 0.0040099 | 9.7E-39 | 439938 | 1 | 36291 | 0.001786481 | 64.94562473 |
| rs34908535 | 2.4E-16 | 5 | 133466337 | G | A | G | 0.92701 | -0.0313937 | 0.00387468 | 2.4E-16 | 439938 | 0.968189 | 36291 | 0.000701874 | 25.4882012 |
| rs35166255 | 0.000000016 | 11 | 126301756 | G | A | G | 0.966333 | 0.0299006 | 0.00553555 | 0.000000016 | 439938 | 0.988289 | 36291 | 0.000437007 | 15.86547361 |
| rs35320232 | 2.6E-41 | 1 | 198618104 | C | T | C | 0.880724 | 0.0391821 | 0.00306965 | 2.6E-41 | 439938 | 0.991294 | 36291 | 0.001373647 | 49.91683962 |
| rs35436417 | 1.2E-19 | 16 | 11310783 | A | T | A | 0.76306 | 0.0202113 | 0.00235115 | 1.2E-19 | 439938 | 0.988116 | 36291 | 0.000521791 | 18.94516544 |
| rs35850753 | 0.000000018 | 17 | 7578671 | C | T | C | 0.980247 | -0.0416451 | 0.00728586 | 0.000000018 | 439938 | 0.956274 | 36291 | 0.00060066 | 21.81045952 |
| rs36084354 | 2E-35 | 19 | 1079959 | G | A | G | 0.908206 | 0.0429274 | 0.00344252 | 2E-35 | 439938 | 1 | 36291 | 0.001468429 | 53.36617445 |
| rs3731828 | 6E-12 | 2 | 85806266 | C | T | C | 0.718224 | 0.0143417 | 0.00219662 | 6E-12 | 439938 | 1 | 36291 | 0.000297681 | 10.80577449 |
| rs3757387 | 1.4E-14 | 7 | 128576086 | T | C | T | 0.545715 | 0.0145446 | 0.00199664 | 1.4E-14 | 439938 | 0.997794 | 36291 | 0.000478089 | 17.35765724 |
| rs3772598 | 0.000000021 | 3 | 148559175 | C | T | C | 0.0320674 | 0.031591 | 0.00564998 | 0.000000021 | 439938 | 0.988181 | 36291 | 0.000860694 | 31.26062255 |
| rs3778607 | 5.6E-34 | 6 | 403799 | A | G | A | 0.452366 | -0.0230579 | 0.00200033 | 5.6E-34 | 439938 | 1 | 36291 | 0.001519713 | 55.23278864 |
| rs3786586 | 5.2E-25 | 19 | 16495287 | A | G | A | 0.845419 | -0.0283584 | 0.00275526 | 5.2E-25 | 439938 | 0.996382 | 36291 | 0.000812129 | 29.49531763 |
| rs3850648 | 1.5E-11 | 3 | 196456964 | A | G | A | 0.265669 | 0.0137058 | 0.00224184 | 1.5E-11 | 439938 | 1 | 36291 | 0.000742565 | 26.96697262 |
| rs3893464 | 4.1E-48 | 6 | 29935250 | G | A | G | 0.513433 | 0.0423173 | 0.00308482 | 4.1E-48 | 439938 | 0.999967 | 36291 | 0.002940662 | 107.0284326 |
| rs3950296 | 9.7E-23 | 3 | 169493283 | C | G | C | 0.755864 | -0.0219385 | 0.00230651 | 9.7E-23 | 439938 | 0.999604 | 36291 | 0.000629643 | 22.86350492 |
| rs4072859 | 3.9E-24 | 3 | 49032205 | G | C | G | 0.341202 | -0.0212814 | 0.00209075 | 3.9E-24 | 439938 | 0.999204 | 36291 | 0.001646571 | 59.8509482 |
| rs410867 | 4E-118 | 19 | 16427111 | A | G | A | 0.783139 | 0.0547271 | 0.00241761 | 4E-118 | 439938 | 0.99765 | 36291 | 0.003628515 | 132.1547242 |
| rs41280005 | 6.8E-26 | 22 | 37316133 | G | A | G | 0.833373 | 0.0287303 | 0.00268903 | 6.8E-26 | 439938 | 0.986583 | 36291 | 0.000862585 | 31.32935938 |
| rs412884 | 4E-142 | 19 | 40219449 | T | C | T | 0.328053 | -0.0527386 | 0.00211757 | 4E-142 | 439938 | 0.998548 | 36291 | 0.010287946 | 377.2200816 |
| rs41313381 | 7.1E-13 | 1 | 79411968 | C | A | C | 0.96899 | -0.0384569 | 0.00559752 | 7.1E-13 | 439938 | 1 | 36291 | 0.000712389 | 25.87030788 |
| rs4243951 | 0.000000016 | 11 | 9856524 | A | G | A | 0.24354 | 0.0119875 | 0.00232525 | 0.000000016 | 439938 | 0.992043 | 36291 | 0.000562362 | 20.41905153 |
| rs4272 | 9.4E-34 | 7 | 92236829 | A | G | A | 0.788821 | -0.0285834 | 0.00244269 | 9.4E-34 | 439938 | 0.991756 | 36291 | 0.00097405 | 35.38175096 |
| rs4299301 | 3.8E-12 | 2 | 181847405 | A | T | A | 0.43281 | -0.0136187 | 0.0020225 | 3.8E-12 | 439938 | 0.973872 | 36291 | 0.000552364 | 20.05581964 |
| rs431978 | 6.6E-11 | 6 | 149793000 | A | G | A | 0.591784 | -0.0133097 | 0.00203043 | 6.6E-11 | 439938 | 0.99099 | 36291 | 0.000354422 | 12.86616249 |
| rs4328821 | 1.1E-306 | 3 | 128316435 | A | G | A | 0.892035 | 0.12327 | 0.00319084 | 1.1E-306 | 439938 | 1 | 36291 | 0.013040859 | 479.4927187 |
| rs4369416 | 9E-17 | 11 | 128326463 | C | T | C | 0.701974 | -0.0174965 | 0.00219714 | 9E-17 | 439938 | 0.974094 | 36291 | 0.000458302 | 16.63896411 |
| rs4396523 | 3.4E-15 | 16 | 57442191 | T | C | T | 0.919492 | 0.0284572 | 0.00369755 | 3.4E-15 | 439938 | 0.974598 | 36291 | 0.000603603 | 21.91736185 |
| rs4407894 | 0.000000028 | 8 | 19933896 | T | C | T | 0.342079 | -0.0120378 | 0.00211727 | 0.000000028 | 439938 | 0.979758 | 36291 | 0.000518078 | 18.81026176 |
| rs445 | 6.7E-56 | 7 | 92408370 | C | T | C | 0.903611 | 0.0505752 | 0.00336709 | 6.7E-56 | 439938 | 1 | 36291 | 0.002083017 | 75.74840445 |
| rs45577137 | 2.4E-34 | 8 | 48651633 | A | G | A | 0.955325 | 0.0604442 | 0.00514132 | 2.4E-34 | 439938 | 0.872612 | 36291 | 0.001951728 | 70.96474311 |
| rs4594881 | 1E-58 | 5 | 35846815 | G | T | G | 0.65961 | 0.0328636 | 0.00209627 | 1E-58 | 439938 | 0.995828 | 36291 | 0.001816495 | 66.0387332 |
| rs4652556 | 4.9E-09 | 1 | 181040588 | G | C | G | 0.386666 | 0.0112264 | 0.00204055 | 4.9E-09 | 439938 | 0.988405 | 36291 | 0.000419239 | 15.22016286 |
| rs467728 | 8E-18 | 5 | 98289567 | G | A | G | 0.683457 | 0.0184112 | 0.0021337 | 8E-18 | 439938 | 0.993461 | 36291 | 0.000536065 | 19.46368654 |
| rs4680250 | 2E-12 | 3 | 150941492 | C | G | C | 0.306182 | 0.0144925 | 0.00217905 | 2E-12 | 439938 | 0.971129 | 36291 | 0.000789399 | 28.66912381 |
| rs4699720 | 6.7E-09 | 4 | 100073261 | C | T | C | 0.231735 | 0.0134487 | 0.00236121 | 6.7E-09 | 439938 | 0.998195 | 36291 | 0.000706418 | 25.6533181 |
| rs4703730 | 2.9E-17 | 5 | 76549688 | C | T | C | 0.483385 | 0.0169884 | 0.0019899 | 2.9E-17 | 439938 | 0.995185 | 36291 | 0.000764797 | 27.77495545 |
| rs4719488 | 4.5E-14 | 7 | 17007526 | G | T | G | 0.706395 | 0.0164386 | 0.00221074 | 4.5E-14 | 439938 | 0.971667 | 36291 | 0.000399531 | 14.50438548 |
| rs4739140 | 4.1E-13 | 8 | 79753010 | C | T | C | 0.389988 | 0.0149511 | 0.00205598 | 4.1E-13 | 439938 | 0.98113 | 36291 | 0.000731716 | 26.57269382 |
| rs4740848 | 3.3E-17 | 9 | 6554558 | G | A | G | 0.468082 | 0.0166377 | 0.00199306 | 3.3E-17 | 439938 | 1 | 36291 | 0.000762027 | 27.67427066 |
| rs4761524 | 2.7E-09 | 12 | 94144175 | A | G | A | 0.496769 | -0.0121553 | 0.00199128 | 2.7E-09 | 439938 | 0.995534 | 36291 | 0.00037819 | 13.72932078 |
| rs4785903 | 1.7E-38 | 16 | 2838274 | T | C | T | 0.245311 | 0.029461 | 0.00231614 | 1.7E-38 | 439938 | 0.992237 | 36291 | 0.003405588 | 124.0076896 |
| rs4812447 | 2.5E-10 | 20 | 39272620 | A | G | A | 0.559419 | -0.0116527 | 0.00201862 | 2.5E-10 | 439938 | 0.986272 | 36291 | 0.000294655 | 10.69587137 |
| rs4819618 | 7.3E-18 | 22 | 18133808 | G | A | G | 0.52189 | -0.0164162 | 0.00199957 | 7.3E-18 | 439938 | 0.99491 | 36291 | 0.000645534 | 23.44091993 |
| rs4848611 | 3.9E-29 | 2 | 112388229 | T | C | T | 0.232859 | -0.0255163 | 0.00234225 | 3.9E-29 | 439938 | 0.99598 | 36291 | 0.002570188 | 93.50987491 |
| rs4851601 | 2.7E-39 | 2 | 103116261 | G | A | G | 0.715345 | -0.0283695 | 0.00221837 | 2.7E-39 | 439938 | 0.973606 | 36291 | 0.00116589 | 42.35837307 |
| rs487127 | 9.4E-09 | 11 | 88077660 | C | T | C | 0.333944 | 0.0120466 | 0.002106 | 9.4E-09 | 439938 | 0.997514 | 36291 | 0.000532596 | 19.33767736 |
| rs4871849 | 2.2E-50 | 8 | 22964719 | G | A | G | 0.292234 | 0.0314145 | 0.00219968 | 2.2E-50 | 439938 | 0.986109 | 36291 | 0.003781142 | 137.7346698 |
| rs4879832 | 9.4E-10 | 9 | 34830432 | T | C | T | 0.384184 | 0.0108756 | 0.00204198 | 9.4E-10 | 439938 | 0.99586 | 36291 | 0.000395688 | 14.36479373 |
| rs4963418 | 1.4E-12 | 11 | 61533797 | A | T | A | 0.567693 | -0.013783 | 0.00200529 | 1.4E-12 | 439938 | 0.998772 | 36291 | 0.000405741 | 14.72989579 |
| rs4976689 | 1.5E-22 | 5 | 176784448 | C | G | C | 0.668279 | -0.0200248 | 0.00210868 | 1.5E-22 | 439938 | 0.994998 | 36291 | 0.000659564 | 23.95072699 |
| rs511515 | 6E-35 | 6 | 33541507 | A | G | A | 0.299359 | -0.0275791 | 0.00220174 | 6E-35 | 439938 | 0.997895 | 36291 | 0.002864354 | 104.2431151 |
| rs523066 | 2.8E-10 | 1 | 111348029 | C | G | C | 0.397691 | -0.0130344 | 0.00202526 | 2.8E-10 | 439938 | 0.99565 | 36291 | 0.000553384 | 20.092869 |
| rs550966 | 6.4E-09 | 1 | 38204012 | G | C | G | 0.474541 | 0.0102724 | 0.00198744 | 6.4E-09 | 439938 | 0.995901 | 36291 | 0.000286328 | 10.39354586 |
| rs55762216 | 1.5E-11 | 4 | 57765731 | G | C | G | 0.816256 | 0.0185728 | 0.00257165 | 1.5E-11 | 439938 | 0.997106 | 36291 | 0.000380621 | 13.81760019 |
| rs55787807 | 2.2E-36 | 19 | 45743135 | G | A | G | 0.74048 | 0.02812 | 0.00227827 | 2.2E-36 | 439938 | 0.991751 | 36291 | 0.001073376 | 38.99360722 |
| rs55868524 | 0.000000021 | 17 | 7170665 | G | A | G | 0.394758 | -0.0112939 | 0.00203792 | 0.000000021 | 439938 | 0.99519 | 36291 | 0.000416083 | 15.10551945 |
| rs55879743 | 1.7E-54 | 7 | 75470364 | C | T | C | 0.933616 | -0.0605571 | 0.00405393 | 1.7E-54 | 439938 | 0.969726 | 36291 | 0.002497969 | 90.87579076 |
| rs55955211 | 2.6E-13 | 22 | 50656109 | A | C | A | 0.926178 | -0.0268147 | 0.00381948 | 2.6E-13 | 439938 | 1 | 36291 | 0.000518318 | 18.81898627 |
| rs55977204 | 0.00000002 | 5 | 142501095 | T | C | T | 0.886748 | -0.0178655 | 0.00313608 | 0.00000002 | 439938 | 0.985835 | 36291 | 0.000279185 | 10.13415906 |
| rs56148005 | 8.3E-11 | 3 | 183738579 | G | A | G | 0.674554 | -0.0137856 | 0.00211829 | 8.3E-11 | 439938 | 0.997088 | 36291 | 0.000307579 | 11.16517161 |
| rs56179563 | 2.9E-13 | 7 | 129685597 | G | A | G | 0.611606 | -0.0154481 | 0.00206012 | 2.9E-13 | 439938 | 0.977055 | 36291 | 0.000451905 | 16.40658408 |
| rs56320921 | 1.6E-10 | 16 | 81512760 | C | T | C | 0.93004 | 0.0246186 | 0.0039009 | 1.6E-10 | 439938 | 1 | 36291 | 0.000427652 | 15.52571602 |
| rs56330463 | 6.7E-82 | 5 | 148200011 | T | C | T | 0.447713 | -0.037235 | 0.00201467 | 6.7E-82 | 439938 | 0.980967 | 36291 | 0.003986922 | 145.2605436 |
| rs564443 | 6.2E-16 | 10 | 89807917 | G | A | G | 0.837454 | -0.0220803 | 0.00269592 | 6.2E-16 | 439938 | 0.996002 | 36291 | 0.000505174 | 18.34154179 |
| rs5748861 | 1.1E-09 | 22 | 17567947 | C | T | C | 0.381069 | 0.0113107 | 0.00205639 | 1.1E-09 | 439938 | 0.994453 | 36291 | 0.000428326 | 15.55018852 |
| rs57633475 | 1.3E-17 | 18 | 46469650 | A | G | A | 0.878357 | 0.0261375 | 0.00305881 | 1.3E-17 | 439938 | 0.993177 | 36291 | 0.00061488 | 22.32709602 |
| rs57707030 | 1.3E-12 | 2 | 112012682 | C | A | C | 0.603377 | -0.0146884 | 0.00202159 | 1.3E-12 | 439938 | 0.996203 | 36291 | 0.000421073 | 15.28676992 |
| rs57834782 | 6.5E-121 | 7 | 20502828 | T | A | T | 0.75442 | 0.0527214 | 0.0023103 | 6.5E-121 | 439938 | 0.995065 | 36291 | 0.003643623 | 132.7069709 |
| rs58745116 | 1.4E-10 | 17 | 33803592 | G | A | G | 0.607553 | 0.0124346 | 0.00203854 | 1.4E-10 | 439938 | 0.997628 | 36291 | 0.000297383 | 10.79494126 |
| rs59902559 | 9E-16 | 17 | 55422014 | T | C | T | 0.961236 | 0.0395107 | 0.00518749 | 9E-16 | 439938 | 0.981773 | 36291 | 0.000821384 | 29.83170328 |
| rs60029573 | 9.8E-159 | 4 | 38663863 | T | C | T | 0.786835 | -0.0636967 | 0.0024276 | 9.8E-159 | 439938 | 0.999619 | 36291 | 0.004870783 | 177.621003 |
| rs6013210 | 7.6E-13 | 20 | 50165634 | C | G | C | 0.881509 | 0.021458 | 0.0031259 | 7.6E-13 | 439938 | 0.972385 | 36291 | 0.000406874 | 14.77106234 |
| rs6017247 | 1.9E-22 | 20 | 42657841 | T | C | T | 0.270241 | 0.0217589 | 0.00224964 | 1.9E-22 | 439938 | 0.999384 | 36291 | 0.001844409 | 67.05542178 |
| rs60181389 | 1.6E-12 | 6 | 211182 | C | T | C | 0.880753 | 0.023872 | 0.00306578 | 1.6E-12 | 439938 | 0.996492 | 36291 | 0.000510261 | 18.52631583 |
| rs60600003 | 7.5E-35 | 7 | 37382465 | T | G | T | 0.899654 | -0.0409545 | 0.00332776 | 7.5E-35 | 439938 | 0.9867 | 36291 | 0.001384729 | 50.32009711 |
| rs6080761 | 4.5E-18 | 20 | 17629162 | G | A | G | 0.579959 | -0.0168596 | 0.00202064 | 4.5E-18 | 439938 | 1 | 36291 | 0.000586645 | 21.30126662 |
| rs61731111 | 2.2E-47 | 19 | 3179517 | C | T | C | 0.988934 | 0.132837 | 0.00952651 | 2.2E-47 | 439938 | 1 | 36291 | 0.004130968 | 150.530523 |
| rs62003467 | 1.5E-12 | 14 | 52618827 | C | A | C | 0.429205 | 0.0138005 | 0.00201887 | 1.5E-12 | 439938 | 0.995114 | 36291 | 0.000573426 | 20.82100042 |
| rs62006172 | 9.9E-14 | 15 | 38904527 | G | A | G | 0.957945 | 0.0357388 | 0.0049722 | 9.9E-14 | 439938 | 1 | 36291 | 0.000703775 | 25.55727235 |
| rs62026377 | 9.6E-125 | 16 | 11229128 | G | T | G | 0.748987 | 0.053194 | 0.00229757 | 9.6E-125 | 439938 | 0.996714 | 36291 | 0.003759991 | 136.961279 |
| rs62105489 | 3.7E-14 | 2 | 8757326 | C | T | C | 0.946875 | 0.0316343 | 0.00443635 | 3.7E-14 | 439938 | 0.982808 | 36291 | 0.000621253 | 22.55867547 |
| rs62117160 | 4.6E-20 | 19 | 45232161 | G | A | G | 0.954635 | 0.0433837 | 0.00477636 | 4.6E-20 | 439938 | 1 | 36291 | 0.001082155 | 39.31286326 |
| rs622608 | 1.5E-24 | 1 | 93715219 | G | A | G | 0.620937 | 0.0210262 | 0.00203795 | 1.5E-24 | 439938 | 0.999403 | 36291 | 0.000824373 | 29.94033623 |
| rs62270945 | 1.4E-10 | 3 | 128201889 | C | T | C | 0.972023 | -0.0364815 | 0.0060067 | 1.4E-10 | 439938 | 1 | 36291 | 0.000590403 | 21.43777768 |
| rs62280667 | 2.1E-21 | 3 | 101084604 | T | C | T | 0.661439 | 0.0191065 | 0.00209636 | 2.1E-21 | 439938 | 0.998071 | 36291 | 0.000611498 | 22.20421844 |
| rs62324212 | 2.4E-26 | 4 | 123560939 | C | A | C | 0.563206 | -0.0201279 | 0.00200731 | 2.4E-26 | 439938 | 0.996316 | 36291 | 0.000874208 | 31.75187757 |
| rs62408225 | 2.4E-84 | 6 | 90956409 | A | G | A | 0.648873 | 0.0391454 | 0.00207823 | 2.4E-84 | 439938 | 0.999406 | 36291 | 0.002652163 | 96.50025978 |
| rs62541534 | 1.2E-38 | 9 | 5028921 | C | G | C | 0.740756 | -0.029102 | 0.00226922 | 1.2E-38 | 439938 | 0.994394 | 36291 | 0.001151349 | 41.8294644 |
| rs637064 | 3.4E-35 | 11 | 108140909 | C | T | C | 0.444615 | -0.0238738 | 0.00200021 | 3.4E-35 | 439938 | 1 | 36291 | 0.001662282 | 60.42300082 |
| rs6472241 | 5.7E-13 | 8 | 66910531 | G | C | G | 0.673616 | 0.0146135 | 0.00212378 | 5.7E-13 | 439938 | 0.998055 | 36291 | 0.000345867 | 12.5555018 |
| rs6498021 | 0.000000001 | 16 | 27414378 | T | G | T | 0.139088 | 0.0174362 | 0.00290611 | 0.000000001 | 439938 | 0.975875 | 36291 | 0.000933037 | 33.89061113 |
| rs6501383 | 9E-17 | 17 | 68277932 | T | C | T | 0.247573 | 0.018178 | 0.00230589 | 9E-17 | 439938 | 0.997022 | 36291 | 0.001299632 | 47.22372631 |
| rs6540985 | 3.5E-22 | 1 | 9708688 | A | G | A | 0.681064 | 0.0198194 | 0.00214045 | 3.5E-22 | 439938 | 0.982521 | 36291 | 0.000623391 | 22.63633353 |
| rs6543250 | 3.5E-10 | 2 | 98640981 | A | G | A | 0.396043 | 0.0122534 | 0.00202737 | 3.5E-10 | 439938 | 0.992848 | 36291 | 0.00049065 | 17.81392101 |
| rs6549439 | 9.9E-09 | 3 | 72161259 | T | C | T | 0.52753 | -0.0108445 | 0.00199749 | 9.9E-09 | 439938 | 0.984409 | 36291 | 0.000277964 | 10.08984123 |
| rs6550653 | 5.2E-13 | 3 | 18812736 | A | G | A | 0.548526 | 0.0137854 | 0.00199329 | 5.2E-13 | 439938 | 0.997509 | 36291 | 0.000426981 | 15.50131706 |
| rs6568466 | 6.2E-50 | 6 | 107444153 | T | C | T | 0.451292 | -0.0294918 | 0.00201401 | 6.2E-50 | 439938 | 0.978508 | 36291 | 0.002478889 | 90.17996144 |
| rs6573020 | 3.6E-23 | 14 | 55871452 | C | T | C | 0.567012 | -0.0193777 | 0.00202883 | 3.6E-23 | 439938 | 0.981686 | 36291 | 0.00079743 | 28.9610273 |
| rs663743 | 6.2E-09 | 11 | 64107735 | G | A | G | 0.658885 | -0.0128515 | 0.00210154 | 6.2E-09 | 439938 | 0.994384 | 36291 | 0.000277858 | 10.08600083 |
| rs6672031 | 3E-21 | 1 | 172796505 | C | G | C | 0.512455 | -0.0190461 | 0.00201624 | 3E-21 | 439938 | 0.962602 | 36291 | 0.000884461 | 32.1246238 |
| rs6672038 | 7E-33 | 1 | 87751670 | C | T | C | 0.881331 | -0.0352583 | 0.00306539 | 7E-33 | 439938 | 0.993987 | 36291 | 0.001112181 | 40.40486449 |
| rs66968950 | 0.000000017 | 4 | 80909460 | C | A | C | 0.370701 | 0.0113609 | 0.00205812 | 0.000000017 | 439938 | 0.999652 | 36291 | 0.000443322 | 16.09485497 |
| rs6696908 | 3.7E-12 | 1 | 212907866 | T | C | T | 0.352495 | -0.0143416 | 0.00207174 | 3.7E-12 | 439938 | 0.999461 | 36291 | 0.000734531 | 26.67497704 |
| rs670712 | 8.1E-17 | 11 | 126060666 | G | A | G | 0.595509 | -0.0159577 | 0.00204745 | 8.1E-17 | 439938 | 0.977861 | 36291 | 0.000502498 | 18.24431307 |
| rs6764912 | 1.9E-09 | 3 | 128372487 | G | A | G | 0.933409 | -0.024802 | 0.00407998 | 1.9E-09 | 439938 | 0.944983 | 36291 | 0.000416942 | 15.13670122 |
| rs68185054 | 6.2E-14 | 5 | 135224459 | T | C | T | 0.93467 | 0.0289055 | 0.00403388 | 6.2E-14 | 439938 | 0.986296 | 36291 | 0.00057066 | 20.7205217 |
| rs6909814 | 4.4E-12 | 6 | 374333 | T | C | T | 0.967884 | 0.0396111 | 0.00593642 | 4.4E-12 | 439938 | 0.918843 | 36291 | 0.000708135 | 25.71573367 |
| rs6932056 | 1.5E-17 | 6 | 138242437 | T | C | T | 0.968502 | 0.0467845 | 0.0057443 | 1.5E-17 | 439938 | 0.970078 | 36291 | 0.001024959 | 37.23290172 |
| rs6937244 | 1.3E-09 | 6 | 90468465 | C | A | C | 0.173825 | 0.0153707 | 0.00262286 | 1.3E-09 | 439938 | 0.995675 | 36291 | 0.000844156 | 30.65946572 |
| rs6944096 | 1.6E-83 | 7 | 148870026 | A | G | A | 0.384266 | -0.0380039 | 0.00204471 | 1.6E-83 | 439938 | 0.996889 | 36291 | 0.004824176 | 175.9131511 |
| rs6956283 | 9.4E-14 | 7 | 98756597 | C | T | C | 0.267254 | 0.0161831 | 0.00224429 | 9.4E-14 | 439938 | 0.997651 | 36291 | 0.001030195 | 37.4233114 |
| rs7020893 | 1.4E-39 | 9 | 94121330 | G | A | G | 0.815202 | 0.0332378 | 0.00256085 | 1.4E-39 | 439938 | 0.996035 | 36291 | 0.001224035 | 44.47343627 |
| rs7025549 | 1.9E-10 | 9 | 16881256 | T | G | T | 0.344569 | 0.0124204 | 0.0020968 | 1.9E-10 | 439938 | 0.991332 | 36291 | 0.000554349 | 20.12793277 |
| rs7036656 | 7.6E-15 | 9 | 21990457 | C | T | C | 0.278284 | -0.0175056 | 0.00221997 | 7.6E-15 | 439938 | 0.995209 | 36291 | 0.001195683 | 43.44208238 |
| rs7048839 | 7.2E-10 | 9 | 4835444 | T | G | T | 0.141845 | -0.0174029 | 0.00285137 | 7.2E-10 | 439938 | 0.99187 | 36291 | 0.000960923 | 34.90447394 |
| rs7080536 | 2.5E-18 | 10 | 115348046 | G | A | G | 0.956744 | 0.0433737 | 0.00495728 | 2.5E-18 | 439938 | 1 | 36291 | 0.001040992 | 37.81593368 |
| rs708776 | 8.8E-10 | 1 | 226923505 | G | T | G | 0.0593673 | -0.0242936 | 0.00423609 | 8.8E-10 | 439938 | 0.975812 | 36291 | 0.000901385 | 32.73987367 |
| rs7098710 | 1.3E-56 | 10 | 26734987 | C | T | C | 0.598866 | -0.0311477 | 0.00202811 | 1.3E-56 | 439938 | 0.998302 | 36291 | 0.001910126 | 69.44921981 |
| rs71429414 | 2.5E-15 | 13 | 42945821 | G | A | G | 0.803431 | 0.0187931 | 0.00250726 | 2.5E-15 | 439938 | 1 | 36291 | 0.000404264 | 14.67625484 |
| rs7143609 | 0.000000028 | 14 | 103878148 | G | T | G | 0.37248 | 0.0108786 | 0.00205952 | 0.000000028 | 439938 | 0.99861 | 36291 | 0.000404354 | 14.67953855 |
| rs71615437 | 1.4E-11 | 3 | 46018781 | A | G | A | 0.918754 | 0.0242694 | 0.00366342 | 1.4E-11 | 439938 | 0.976076 | 36291 | 0.000442475 | 16.06407849 |
| rs7163275 | 6.6E-10 | 15 | 70983042 | G | A | G | 0.116585 | -0.0189259 | 0.00310339 | 6.6E-10 | 439938 | 0.995904 | 36291 | 0.000986445 | 35.83244104 |
| rs7201518 | 1.1E-32 | 16 | 30082508 | G | T | G | 0.519557 | 0.0234595 | 0.00199066 | 1.1E-32 | 439938 | 0.999553 | 36291 | 0.001330144 | 48.33388509 |
| rs7236869 | 2.3E-14 | 18 | 20624223 | C | T | C | 0.368048 | -0.0156992 | 0.00206731 | 2.3E-14 | 439938 | 0.998461 | 36291 | 0.000848245 | 30.80808084 |
| rs7257 | 1.4E-49 | 15 | 80191343 | G | A | G | 0.432396 | -0.0289418 | 0.0020112 | 1.4E-49 | 439938 | 1 | 36291 | 0.002509666 | 91.30240054 |
| rs72657048 | 5.1E-12 | 1 | 25289734 | C | G | C | 0.501502 | -0.0139727 | 0.0019826 | 5.1E-12 | 439938 | 0.99207 | 36291 | 0.000495331 | 17.9839703 |
| rs72699870 | 1.9E-21 | 14 | 93116351 | T | C | T | 0.804418 | 0.0239331 | 0.00252019 | 1.9E-21 | 439938 | 0.989443 | 36291 | 0.000652692 | 23.70102106 |
| rs72743461 | 1.5E-38 | 15 | 67441750 | C | A | C | 0.763923 | -0.0303309 | 0.00234918 | 1.5E-38 | 439938 | 0.998272 | 36291 | 0.001173639 | 42.64023193 |
| rs72755295 | 3E-10 | 1 | 242034263 | A | G | A | 0.966699 | 0.0351686 | 0.00555137 | 3E-10 | 439938 | 0.985484 | 36291 | 0.000602476 | 21.87643083 |
| rs72773181 | 3.6E-17 | 5 | 110055207 | A | T | A | 0.910252 | -0.0289095 | 0.00347078 | 3.6E-17 | 439938 | 0.998807 | 36291 | 0.000660297 | 23.97736415 |
| rs72831272 | 6.9E-09 | 17 | 57448441 | G | A | G | 0.970475 | -0.0331413 | 0.0058765 | 6.9E-09 | 439938 | 1 | 36291 | 0.00050037 | 18.16701052 |
| rs72834751 | 4.3E-09 | 10 | 64559465 | C | T | C | 0.987502 | 0.0565469 | 0.00944147 | 4.3E-09 | 439938 | 0.894588 | 36291 | 0.000759479 | 27.58169547 |
| rs7288670 | 2.3E-32 | 22 | 24621826 | A | G | A | 0.693813 | 0.0254922 | 0.00216635 | 2.3E-32 | 439938 | 0.997515 | 36291 | 0.000997176 | 36.22263321 |
| rs72896231 | 9.4E-12 | 6 | 34979247 | C | T | C | 0.880463 | -0.0198411 | 0.00306206 | 9.4E-12 | 439938 | 1 | 36291 | 0.000352912 | 12.81135905 |
| rs7302975 | 9.1E-19 | 12 | 32138924 | T | C | T | 0.220097 | 0.0208323 | 0.0023982 | 9.1E-19 | 439938 | 0.999138 | 36291 | 0.00168757 | 61.34376202 |
| rs73086541 | 2.1E-10 | 7 | 20376103 | C | A | C | 0.60501 | 0.0129734 | 0.00204055 | 2.1E-10 | 439938 | 0.990645 | 36291 | 0.000325457 | 11.81434991 |
| rs73187850 | 1.2E-16 | 7 | 101867824 | A | T | A | 0.72217 | -0.0181071 | 0.00222476 | 1.2E-16 | 439938 | 0.992631 | 36291 | 0.000467611 | 16.97706396 |
| rs73195844 | 1.8E-19 | 12 | 111344572 | C | T | C | 0.919012 | -0.0352589 | 0.0038268 | 1.8E-19 | 439938 | 0.899572 | 36291 | 0.000903453 | 32.81505097 |
| rs7320862 | 2.4E-09 | 13 | 100125352 | T | C | T | 0.905998 | 0.0194003 | 0.00342349 | 2.4E-09 | 439938 | 0.995009 | 36291 | 0.000302022 | 10.9633852 |
| rs73231203 | 2.9E-18 | 21 | 45667484 | G | A | G | 0.794791 | 0.0206183 | 0.00247168 | 2.9E-18 | 439938 | 0.995503 | 36291 | 0.000498141 | 18.0860429 |
| rs7327960 | 3.9E-10 | 13 | 74682892 | T | C | T | 0.173784 | -0.0160283 | 0.00263752 | 3.9E-10 | 439938 | 0.990991 | 36291 | 0.00090889 | 33.01269802 |
| rs73963711 | 3.8E-21 | 18 | 60874413 | C | T | C | 0.789822 | -0.0232962 | 0.00246617 | 3.8E-21 | 439938 | 0.978881 | 36291 | 0.000642613 | 23.33478959 |
| rs7423615 | 8.5E-17 | 2 | 231116874 | C | T | C | 0.812652 | -0.0214431 | 0.00252985 | 8.5E-17 | 439938 | 1 | 36291 | 0.000515091 | 18.7017642 |
| rs74292032 | 1.2E-22 | 6 | 33035315 | A | G | A | 0.985187 | 0.0805789 | 0.00841234 | 1.2E-22 | 439938 | 0.965461 | 36291 | 0.001834783 | 66.70483596 |
| rs74431709 | 7.7E-38 | 1 | 101653125 | T | G | T | 0.889075 | 0.0379962 | 0.00315896 | 7.7E-38 | 439938 | 0.990318 | 36291 | 0.001252566 | 45.51135923 |
| rs74480102 | 1E-63 | 17 | 7742601 | G | A | G | 0.957042 | 0.0805824 | 0.00490565 | 1E-63 | 439938 | 1 | 36291 | 0.003629112 | 132.1765423 |
| rs74612091 | 4.5E-49 | 9 | 135877278 | T | A | T | 0.937154 | -0.0583493 | 0.00412157 | 4.5E-49 | 439938 | 0.978408 | 36291 | 0.00227774 | 82.84560749 |
| rs74915527 | 4.2E-16 | 8 | 48806383 | C | T | C | 0.90371 | -0.0258605 | 0.00338549 | 4.2E-16 | 439938 | 0.991978 | 36291 | 0.000542546 | 19.69914378 |
| rs7498831 | 2.6E-23 | 16 | 48696528 | A | G | A | 0.312479 | -0.0202897 | 0.00214581 | 2.6E-23 | 439938 | 0.997837 | 36291 | 0.001554975 | 56.51636712 |
| rs75056698 | 5E-11 | 3 | 98442051 | T | C | T | 0.744433 | -0.0143356 | 0.00227146 | 5E-11 | 439938 | 0.998764 | 36291 | 0.000277182 | 10.06143465 |
| rs7518125 | 6.5E-19 | 1 | 25249252 | C | A | C | 0.425 | -0.0169939 | 0.00200578 | 6.5E-19 | 439938 | 0.993206 | 36291 | 0.00088416 | 32.11368815 |
| rs752993 | 4E-10 | 8 | 27312809 | G | A | G | 0.555919 | 0.0117595 | 0.00200336 | 4E-10 | 439938 | 0.999881 | 36291 | 0.000304127 | 11.03981204 |
| rs755801 | 2.2E-34 | 1 | 12101252 | C | A | C | 0.759127 | -0.027803 | 0.00232447 | 2.2E-34 | 439938 | 0.988595 | 36291 | 0.001000838 | 36.3557805 |
| rs7569084 | 5.2E-18 | 2 | 65656969 | C | T | C | 0.41464 | -0.0175725 | 0.00200688 | 5.2E-18 | 439938 | 0.99306 | 36291 | 0.000970769 | 35.26247847 |
| rs757228 | 2.1E-11 | 19 | 1101992 | A | G | A | 0.530861 | 0.012961 | 0.00200622 | 2.1E-11 | 439938 | 0.983436 | 36291 | 0.000392603 | 14.25275508 |
| rs7584777 | 4.6E-13 | 2 | 74317747 | T | C | T | 0.697406 | 0.0154268 | 0.00215778 | 4.6E-13 | 439938 | 0.993069 | 36291 | 0.000363146 | 13.18297477 |
| rs7636495 | 4.1E-21 | 3 | 196367936 | G | A | G | 0.818867 | 0.0241416 | 0.00258456 | 4.1E-21 | 439938 | 0.988219 | 36291 | 0.000638378 | 23.18089441 |
| rs7646283 | 8.8E-29 | 3 | 33046480 | C | T | C | 0.633169 | -0.0226816 | 0.00206765 | 8.8E-29 | 439938 | 0.988249 | 36291 | 0.00092519 | 33.60530602 |
| rs76474320 | 2E-19 | 2 | 242806022 | T | C | T | 0.922651 | -0.0318664 | 0.00371962 | 2E-19 | 439938 | 0.990123 | 36291 | 0.000750313 | 27.24855617 |
| rs76487733 | 6.7E-17 | 6 | 135154406 | T | C | T | 0.969035 | -0.0480288 | 0.00580551 | 6.7E-17 | 439938 | 0.970258 | 36291 | 0.001066871 | 38.75702754 |
| rs7674870 | 1E-10 | 4 | 139089463 | A | G | A | 0.587975 | -0.013227 | 0.00202514 | 1E-10 | 439938 | 0.997465 | 36291 | 0.000353762 | 12.84222642 |
| rs76793172 | 1.6E-27 | 19 | 46359794 | C | T | C | 0.908565 | 0.0364944 | 0.00344977 | 1.6E-27 | 439938 | 0.998644 | 36291 | 0.001059214 | 38.47857269 |
| rs76830965 | 2.5E-10 | 3 | 159637678 | C | A | C | 0.882345 | 0.0186117 | 0.00309212 | 2.5E-10 | 439938 | 0.987424 | 36291 | 0.000307765 | 11.17192878 |
| rs76984893 | 2.6E-09 | 6 | 32585456 | A | C | A | 0.958585 | -0.0303546 | 0.00536724 | 2.6E-09 | 439938 | 0.969682 | 36291 | 0.000469067 | 17.02995165 |
| rs7700687 | 9.2E-79 | 5 | 141491985 | C | T | C | 0.382896 | -0.0376883 | 0.00204103 | 9.2E-79 | 439938 | 0.999088 | 36291 | 0.004769823 | 173.9216683 |
| rs773110 | 1.7E-33 | 12 | 56375137 | C | G | C | 0.665702 | -0.0244642 | 0.00210698 | 1.7E-33 | 439938 | 0.997432 | 36291 | 0.00099045 | 35.97805675 |
| rs77356147 | 1.6E-11 | 2 | 196974333 | C | A | C | 0.872224 | 0.018597 | 0.00296246 | 1.6E-11 | 439938 | 0.995098 | 36291 | 0.000320446 | 11.63240731 |
| rs77552263 | 2.3E-13 | 2 | 43786818 | G | A | G | 0.921824 | 0.0251906 | 0.00368277 | 2.3E-13 | 439938 | 0.996766 | 36291 | 0.000472863 | 17.16783927 |
| rs7759516 | 7.9E-11 | 6 | 151838245 | T | C | T | 0.818688 | 0.0159596 | 0.00258252 | 7.9E-11 | 439938 | 0.992964 | 36291 | 0.000279197 | 10.13462212 |
| rs778756 | 2E-19 | 2 | 61781994 | A | G | A | 0.419902 | 0.0164928 | 0.00200144 | 2E-19 | 439938 | 0.999718 | 36291 | 0.000845571 | 30.71089873 |
| rs77962418 | 1.5E-29 | 20 | 30283169 | C | A | C | 0.977605 | 0.0757846 | 0.00674986 | 1.5E-29 | 439938 | 0.998918 | 36291 | 0.002201216 | 80.05613815 |
| rs77984483 | 1.9E-10 | 17 | 79402603 | C | T | C | 0.837874 | 0.0165243 | 0.00269669 | 1.9E-10 | 439938 | 1 | 36291 | 0.000282679 | 10.26103324 |
| rs7840212 | 2.6E-66 | 8 | 130599247 | C | T | C | 0.663378 | 0.0359384 | 0.00211643 | 2.6E-66 | 439938 | 0.988828 | 36291 | 0.002143228 | 77.94264222 |
| rs7846314 | 1.7E-32 | 8 | 61650831 | A | T | A | 0.812941 | 0.0295326 | 0.00255021 | 1.7E-32 | 439938 | 0.998412 | 36291 | 0.000972439 | 35.32317216 |
| rs78692246 | 3E-25 | 11 | 116791307 | G | A | G | 0.944202 | -0.0454807 | 0.00433644 | 3E-25 | 439938 | 0.998581 | 36291 | 0.001314198 | 47.75368948 |
| rs79171715 | 1.9E-16 | 3 | 128776664 | A | C | A | 0.974625 | 0.0498982 | 0.00633343 | 1.9E-16 | 439938 | 0.984109 | 36291 | 0.00103501 | 37.59838162 |
| rs7918084 | 6.1E-56 | 10 | 94429467 | C | T | C | 0.449893 | -0.0308587 | 0.00200187 | 6.1E-56 | 439938 | 0.994523 | 36291 | 0.002737642 | 99.61900149 |
| rs79269306 | 2.1E-20 | 6 | 42143973 | A | G | A | 0.89213 | -0.0284588 | 0.00320895 | 2.1E-20 | 439938 | 0.992228 | 36291 | 0.000692463 | 25.14621352 |
| rs7936312 | 1.5E-101 | 11 | 76293726 | G | T | G | 0.522437 | -0.0417327 | 0.00199153 | 1.5E-101 | 439938 | 0.998561 | 36291 | 0.00417777 | 152.2431328 |
| rs79438468 | 2.7E-09 | 12 | 113508064 | G | A | G | 0.946238 | -0.0261805 | 0.00440221 | 2.7E-09 | 439938 | 1 | 36291 | 0.000428744 | 15.56536665 |
| rs7986796 | 5.9E-36 | 13 | 40351064 | G | T | G | 0.372427 | -0.025092 | 0.00206808 | 5.9E-36 | 439938 | 0.99378 | 36291 | 0.002142131 | 77.90268066 |
| rs8005161 | 0.000000001 | 14 | 88472595 | C | T | C | 0.908919 | -0.0197403 | 0.00345964 | 0.000000001 | 439938 | 1 | 36291 | 0.000309146 | 11.22205301 |
| rs8020739 | 6.7E-26 | 14 | 35882492 | G | T | G | 0.356762 | -0.0215997 | 0.00209049 | 6.7E-26 | 439938 | 0.988824 | 36291 | 0.00163199 | 59.32009113 |
| rs8044535 | 0.000000011 | 16 | 30464034 | T | A | T | 0.430855 | 0.0114558 | 0.00202661 | 0.000000011 | 439938 | 0.980266 | 36291 | 0.000392112 | 14.2349297 |
| rs8061043 | 1.6E-13 | 16 | 11160929 | G | T | G | 0.880414 | 0.0221592 | 0.00307677 | 1.6E-13 | 439938 | 0.991114 | 36291 | 0.000438938 | 15.93561048 |
| rs8067124 | 1.3E-48 | 17 | 38869490 | A | T | A | 0.978117 | -0.109608 | 0.00764072 | 1.3E-48 | 439938 | 0.804366 | 36291 | 0.003906451 | 142.3171717 |
| rs8108623 | 7.4E-15 | 19 | 18408519 | C | A | C | 0.374347 | -0.0169988 | 0.00217833 | 7.4E-15 | 439938 | 0.886327 | 36291 | 0.00092514 | 33.60351156 |
| rs896854 | 3.2E-11 | 8 | 95960511 | T | C | T | 0.488087 | -0.0132094 | 0.00199248 | 3.2E-11 | 439938 | 1 | 36291 | 0.000456413 | 16.57033757 |
| rs912131 | 1E-34 | 13 | 100032346 | A | G | A | 0.298017 | -0.0260317 | 0.00217861 | 1E-34 | 439938 | 0.99829 | 36291 | 0.002595725 | 94.44141662 |
| rs916382 | 5.6E-10 | 1 | 9333348 | C | T | C | 0.408917 | 0.0125685 | 0.00202911 | 5.6E-10 | 439938 | 0.984186 | 36291 | 0.000498896 | 18.1134692 |
| rs9287954 | 5.9E-09 | 2 | 173307573 | C | T | C | 0.888268 | -0.0180072 | 0.00314185 | 5.9E-09 | 439938 | 0.991263 | 36291 | 0.000282639 | 10.25958047 |
| rs9330536 | 2.4E-16 | 17 | 81083854 | T | C | T | 0.513112 | -0.0168458 | 0.00217438 | 2.4E-16 | 439938 | 0.832906 | 36291 | 0.000652572 | 23.69666091 |
| rs9389268 | 2.8E-85 | 6 | 135419631 | A | G | A | 0.739927 | 0.0428207 | 0.00227196 | 2.8E-85 | 439938 | 0.991831 | 36291 | 0.002495325 | 90.77938789 |
| rs9402846 | 2.9E-15 | 6 | 137093377 | G | C | G | 0.411647 | 0.0147606 | 0.00202421 | 2.9E-15 | 439938 | 0.990684 | 36291 | 0.000684813 | 24.86821363 |
| rs9410888 | 3.2E-15 | 9 | 86465402 | G | A | G | 0.747146 | -0.0182478 | 0.00229087 | 3.2E-15 | 439938 | 0.994315 | 36291 | 0.000444756 | 16.14692592 |
| rs9428321 | 1.5E-11 | 1 | 120647620 | T | C | T | 0.332637 | -0.0139695 | 0.00213109 | 1.5E-11 | 439938 | 0.970632 | 36291 | 0.000708428 | 25.7263844 |
| rs9469930 | 0.000000027 | 6 | 11721221 | G | A | G | 0.326166 | 0.0118033 | 0.00211719 | 0.000000027 | 439938 | 1 | 36291 | 0.000517798 | 18.80010269 |
| rs9504361 | 4.8E-57 | 6 | 577820 | A | G | A | 0.553277 | 0.0320209 | 0.00204628 | 4.8E-57 | 439938 | 0.950045 | 36291 | 0.002238361 | 81.41010914 |
| rs954954 | 5.5E-21 | 18 | 60902328 | A | C | A | 0.895027 | 0.0307644 | 0.00326027 | 5.5E-21 | 439938 | 0.99317 | 36291 | 0.000797463 | 28.96224695 |
| rs9557201 | 6.3E-15 | 13 | 99989538 | A | G | A | 0.727363 | -0.017917 | 0.00224691 | 6.3E-15 | 439938 | 0.996337 | 36291 | 0.000450695 | 16.36263158 |
| rs9562080 | 1.7E-15 | 13 | 114923777 | G | C | G | 0.610697 | 0.0152407 | 0.00204647 | 1.7E-15 | 439938 | 0.997067 | 36291 | 0.000442488 | 16.06453765 |
| rs9615956 | 1.6E-09 | 22 | 46749634 | C | T | C | 0.909224 | 0.0193907 | 0.00348519 | 1.6E-09 | 439938 | 0.990807 | 36291 | 0.000296647 | 10.76820469 |
| rs9640663 | 0.000000015 | 7 | 77247821 | G | A | G | 0.416435 | 0.0107979 | 0.00201641 | 0.000000015 | 439938 | 1 | 36291 | 0.000363253 | 13.18686331 |
| rs9666598 | 2.2E-14 | 11 | 325386 | C | G | C | 0.156455 | 0.0204571 | 0.00276529 | 2.2E-14 | 439938 | 0.980299 | 36291 | 0.001385788 | 50.35863374 |
| rs9807989 | 2.1E-306 | 2 | 102971200 | T | C | T | 0.676862 | 0.07935 | 0.00218092 | 2.1E-306 | 439938 | 0.941888 | 36291 | 0.009982325 | 365.901134 |
| rs9815874 | 4.6E-33 | 3 | 188441161 | C | T | C | 0.7005 | -0.0257796 | 0.00216452 | 4.6E-33 | 439938 | 0.998551 | 36291 | 0.00100584 | 36.53769014 |
| rs9815974 | 7.7E-09 | 3 | 71439472 | G | A | G | 0.335296 | 0.0110087 | 0.00210387 | 7.7E-09 | 439938 | 0.993606 | 36291 | 0.000443832 | 16.11336859 |
| rs9819371 | 0.000000015 | 3 | 141206800 | C | T | C | 0.935372 | 0.0215834 | 0.00402618 | 0.000000015 | 439938 | 1 | 36291 | 0.000318372 | 11.55709259 |
| rs9829214 | 9.9E-19 | 3 | 101258135 | T | C | T | 0.37892 | -0.0176035 | 0.00204424 | 9.9E-19 | 439938 | 0.999021 | 36291 | 0.001049607 | 38.12919906 |
| rs9861454 | 2.3E-13 | 3 | 25381636 | T | C | T | 0.591382 | -0.0135212 | 0.00202298 | 2.3E-13 | 439938 | 0.991433 | 36291 | 0.000366929 | 13.3203632 |
| rs9868582 | 6.4E-36 | 3 | 112052927 | G | T | G | 0.547866 | 0.0248171 | 0.00199251 | 6.4E-36 | 439938 | 0.997156 | 36291 | 0.0013864 | 50.38090007 |
| rs9890673 | 5E-11 | 17 | 4565304 | G | A | G | 0.947706 | -0.030125 | 0.00447816 | 5E-11 | 439938 | 0.996355 | 36291 | 0.000558154 | 20.26616205 |
| rs9968554 | 6.7E-10 | 4 | 37927387 | A | G | A | 0.470943 | -0.0124498 | 0.00199919 | 6.7E-10 | 439938 | 0.992213 | 36291 | 0.000422528 | 15.33959894 |
| rs9979383 | 2.7E-53 | 21 | 36715761 | C | T | C | 0.370392 | -0.0315231 | 0.00207031 | 2.7E-53 | 439938 | 0.99539 | 36291 | 0.003394498 | 123.602517 |
