# Supplementary material for: Association between plasma eosinophil count and chronic kidney disease: results from the NHANES 2005-2018 and Mendelian randomization study
Source: Research Square preprint supplement (doi:10.21203/rs.3.rs-5712825/v1), 2025-01-02
Supplement: Supplementary file 2 [file 3f5258e0fde957b06c96b8af.docx]

**Table S2**. The GWAS details of dementia in the Mendelian randomization.

| **Trait** | GWAS ID | Population | Sample size | PMID or web source |
| --- | --- | --- | --- | --- |
| Eosinophils | GCST90028992 | European | 513859 | 29892013 |
| CKD | finngen_R11_N14_CHRONKIDNEYDIS | European | 447473 | www.finngen.fi/en |
| eGFR | GCST90103635 | European | 460826 | 34272381 |
| UACR | GCST90012608 | European | 2935 | 33441150 |
